# Supplementary material for: High-Throughput Sequencing Haplotype Analysis Indicates in LRRK2 Gene a Potential Risk Factor for Endemic Parkinsonism in Southeastern Moravia, Czech Republic
Source: MDPI journal article supplement (doi:10.3390/life12010121), 2022-01-14
Supplement: s1 [file s1]

# High-Throughput Sequencing Haplotype Analysis Indicates in *LRRK2* Gene a Potential Risk Factor for Endemic Parkinsonism in Southeastern Moravia, Czech Republic

Kristyna Kolarikova <sup>1,2,3,4</sup>, Radek Vodicka <sup>1,2,\*</sup>, Radek Vrtel <sup>1,2</sup>, Julia Stellmachova <sup>1,2</sup>, Martin Prochazka <sup>1,2</sup>, Katerina Mensikova <sup>3,4</sup>, Tereza Bartonikova <sup>3,4</sup>, Tomas Furst <sup>5</sup>, Petr Kanovsky <sup>3,4</sup> and Jan Geryk <sup>6,7</sup>

Supplementary Material

Table S1. Verification of non-consanguinity: variants in HVR1 region in six random patients.

|                | 16093C | 16113C | 16126C | 16129A | 16172C | 16223T | 16224C | 16270A | 16294T | 16296T | 16304C | 16311C | 16391A | 16465A | 16519C | Haplogroup |
|----------------|--------|--------|--------|--------|--------|--------|--------|--------|--------|--------|--------|--------|--------|--------|--------|------------|
| Patient 1 (3)  |        |        |        |        |        |        |        |        |        |        |        |        |        |        |        | HV*        |
| Patient 2 (17) |        |        |        |        |        |        |        |        |        |        |        |        |        |        |        | HV*        |
| Patient 3 (22) |        |        |        |        |        |        |        |        |        |        |        |        |        |        |        | K          |
| Patient 4 (23) |        |        |        |        |        |        |        |        |        |        |        |        |        |        |        | T          |
| Patient 5 (24) |        |        |        |        |        |        |        |        |        |        |        |        |        |        |        | U*         |
| Patient 6 (26) |        |        |        |        |        |        |        |        |        |        |        |        |        |        |        | I          |

The green highlighted cells indicate the presence of the variant.

|                       | DYS19 | DYS385a/b | DYS389I/II | DYS390 | DYS391 | DYS392 | DYS393 | DYS437 | 438 | 439 | DYS448 | DYS456 | DYS458 | C4 | H4 |
|-----------------------|-------|-----------|------------|--------|--------|--------|--------|--------|-----|-----|--------|--------|--------|----|----|
| Patient 1 (3)         | 14    | 13/17     | 13/29      | 23     | 11     | 11     | 12     | 15     | 9   | 11  | 20     | 15     | 16     | 21 | 10 |
| Patient 2 (17)        | 13    | 17/18     | 14/31      | 25     | 11     | 11     | 14     | 14     | 10  | 11  | 18     | 15     | 15     | 22 | 12 |
| Patient 3 (22)        | 17    | 11/14     | 13/30      | 26     | 11     | 11     | 13     | 14     | 11  | 12  | 20     | 16     | 17     | 23 | 12 |
| Patient 4 (23)        | 17    | 11/14     | 13/31      | 25     | 11     | 11     | 13     | 14     | 11  | 10  | 20     | 15     | 14     | 23 | 14 |
| Patient 5 (24)        | 14    | 11/14     | 14/30      | 24     | 10     | 13     | 12     | 15     | 12  | 12  | 19     | 16     | 15     | 23 | 11 |
| Patient 6 (26) female |       |           |            |        |        |        |        |        |     |     |        |        |        |    |    |

### Patient 6 (26) female

**Table S3.** Fisher's exact factorial test (C1).

|      | <b>PAR</b> | <b>nonPAR</b> |
|------|------------|---------------|
| H    | 10         | 1             |
| nonH | 52         | 68            |

p-value 0.0031; H – number of patients with haplotype, nonH – number of patients without haplotype, PAR – number of PD patients, nonPAR – number of healthy controls.

**Table S4.** Fisher's exact factorial test (C2).

|      | <b>PAR</b> | <b>nonPAR</b> |
|------|------------|---------------|
| H    | 10         | 7             |
| nonH | 52         | 93            |

p-value 0.11; H – number of patients with haplotype, nonH – number of patients without haplotype, PAR – number of PD patients, nonPAR – healthy controls.

**Table S5.** Contingency table of chi-square test (C3).

|       | <b>PAR</b>   | <b>nonPAR</b> | <b>total</b> |
|-------|--------------|---------------|--------------|
| H     | 10+1         | 47            | 10 +48       |
| nonH  | 52 +p*2516-1 | (1-p)*2516-47 | 62+2516-48   |
| total | 62+p*2516    | (1-p)*2516    | 62+2516      |

p-value < 0.00001; H – number of patients with haplotype, nonH – number of patients without haplotype, PAR – number of PD patients, nonPAR – healthy controls, p – prevalence of PD in the population (assumed p=0.01). Haplotype frequency and RR and OR calculation (we assume p=0.01 i.e. one in a hundred in the control population has PAR):

**Table S6.** Risk ratio (RR) and odds ratio (OR) calculation.

|           | <b>C1</b> | <b>C2</b> | <b>C3</b> |
|-----------|-----------|-----------|-----------|
| <b>RR</b> | 2.09      | 1.65      | 6.3       |
| <b>OR</b> | 13.15     | 2.58      | 7.6       |

C1 is study group of 69 age-matched controls from the researched area; C2 is study group of 100 healthy non-related individuals from the Czech population; C3 is study group of 2516 samples from the 1000 Genome Project.

**Table S7.** Presence of common LRRK2 SNPs found in the patients and 3 randomly selected controls.

| Coordinate (hg19)     | ref      | Patients LRRK2 genotypes |            |            |            |            |       | Controls LRRK2 genotypes |       |       |  | Estimated patients LRRK2 haplotype |
|-----------------------|----------|--------------------------|------------|------------|------------|------------|-------|--------------------------|-------|-------|--|------------------------------------|
| <b>chr12:40626230</b> | <b>T</b> | <b>T/C</b>               | <b>T/C</b> | <b>T/C</b> | <b>T/C</b> | <b>T/C</b> | T/C   | T/C                      | T/C   | T/C   |  | C                                  |
| chr12:40631791        | T        | T/T                      | T/C        | T/C        | T/C        | T/C        | T/C   | T/C                      | T/C   | C/C   |  | T                                  |
| chr12:40634203        | A        | A/G                      | A/G        | A/G        | A/G        | A/G        | A/G   | A/A                      | A/A   | A/A   |  | A/G                                |
| chr12:40645257        | C        | C/C                      | C/A        | C/C        | C/C        | C/C        | C/A   | C/A                      | C/C   | C/C   |  | C                                  |
| chr12:40677655        | C        | C/T                      | C/T        | C/T        | C/T        | C/T        | C/T   | C/C                      | C/C   | C/C   |  | T                                  |
| chr12:40681142        | C        | C/C                      | C/CT       | C/C        | C/CT       | C/CT       | C/CT  | C/CT                     | C/CT  | CT/CT |  | C                                  |
| chr12:40688695        | T        | T/C                      | T/T        | T/T        | T/T        | T/T        | T/T   | T/T                      | T/T   | T/T   |  | T                                  |
| chr12:40702846        | A        | A/T                      | T/T        | A/T        | T/T        | T/T        | T/T   | T/T                      | A/T   | T/T   |  | T                                  |
| chr12:40703046        | CT       | CT/C                     | CT/C       | CT/C       | CT/C       | CT/C       | CT/C  | CT/CT                    | CT/CT | CT/CT |  | CT/C                               |
| chr12:40703087        | C        | C/CGT                    | C/CGT      | C/CGT      | C/CGT      | C/CGT      | C/CGT | C/CGT                    | C/CGT | C/CGT |  | C/CGT                              |
| chr12:40707861        | C        | C/C                      | C/C        | C/C        | C/C        | C/C        | C/C   | C/T                      | C/C   | C/C   |  | C                                  |
| chr12:40708892        | T        | T/C                      | C/C        | T/C        | C/C        | C/C        | C/C   | C/C                      | T/C   | C/C   |  | C                                  |
| chr12:40708922        | C        | C/T                      | T/T        | C/T        | T/T        | T/T        | T/T   | C/T                      | C/C   | T/T   |  | T                                  |
| chr12:40713759        | T        | T/C                      | C/C        | T/C        | C/C        | C/C        | C/C   | T/C                      | T/T   | C/C   |  | C                                  |
| chr12:40713834        | C        | C/A                      | A/A        | C/A        | A/A        | A/A        | A/A   | A/A                      | C/A   | A/A   |  | A                                  |
| chr12:40713873        | A        | A/G                      | G/G        | A/G        | A/G        | G/G        | A/G   | A/G                      | A/A   | A/G   |  | G                                  |
| chr12:40713901        | T        | T/T                      | T/A        | T/T        | T/T        | T/T        | T/A   | T/A                      | T/T   | T/T   |  | T                                  |
| chr12:40714009        | A        | A/A                      | A/A        | A/A        | A/A        | A/G        | A/A   | A/A                      | A/G   | A/A   |  | A                                  |
| chr12:40716015        | C        | C/T                      | T/T        | C/T        | C/T        | C/T        | T/T   | T/T                      | C/T   | T/T   |  | T                                  |
| chr12:40716260        | T        | T/C                      | C/C        | T/C        | C/C        | C/C        | C/C   | T/C                      | T/T   | C/C   |  | C                                  |
| chr12:40740686        | A        | A/G                      | A/G        | A/G        | A/G        | A/G        | A/G   | A/A                      | A/A   | A/A   |  | A/G                                |
| chr12:40742254        | G        | G/G                      | G/A        | A/G        | A/G        | G/G        | G/G   | G/G                      | G/G   | G/A   |  | G                                  |
| chr12:40757330        | A        | A/A                      | A/A        | A/A        | A/A        | A/A        | A/G   | G/G                      | A/G   | A/A   |  | A                                  |
| chr12:40758652        | T        | T/T                      | T/C        | T/T        | T/C        | T/C        | T/C   | C/C                      | C/C   | C/C   |  | T                                  |
| chr12:40760764        | T        | T/C                      | T/C        | T/C        | T/C        | T/C        | T/C   | T/T                      | T/T   | T/T   |  | T/C                                |

The yellow highlighted cells indicates the different allele than is present in potentially risk haplotype.
